# Supplementary material
Source: HighWire-hosted journal article supplement (https://www.annfammed.org/highwire/filestream/14055/field_highwire_adjunct_files/0/Harper.pdf)
Supplement: Harper.pdf [file Harper.pdf]

Supplemental materials for:

Basu T, Kamdar N, Brady P, Cole CM, King J, Rontal R, Harper DM. Annual wellness visits for persons with physical disabilities increased disparately throughout the ACA time frame. *Ann Fam Med*. 2021;19:xxx-xxx.

Supplemental Table 1: Disability Diagnoses Codes: ICD-9-CM and ICD-10-CM

| Condition                 | ICD-9-CM        | ICD-10-CM       |
|---------------------------|-----------------|-----------------|
| <b>Cerebral Palsy</b>     |                 |                 |
|                           | 343.0 - 343.4   | G80.0 - G80.3   |
|                           | 343.8 - 343.9   | G80.8 - G80.9   |
| <b>Spina Bifida</b>       |                 |                 |
|                           | 741.00 - 741.03 | Q05.X           |
|                           | 741.90 - 741.93 |                 |
| <b>Spinal Cord Injury</b> |                 |                 |
|                           | 952.0X          | S34             |
|                           | 952.1X          | S14             |
|                           | 952.2 - 952.9   | S24             |
|                           | 806.0X - 806.3X |                 |
|                           | 806.4 - 806.5   |                 |
|                           | 806.6X - 806.7X |                 |
|                           | 806.8 - 806.9   |                 |
| <b>Multiple Sclerosis</b> |                 |                 |
|                           | 340             | G35             |
| <b>Hemiplegia</b>         |                 |                 |
|                           | 342.00 - 342.01 | G81.00 - G81.04 |
|                           | 342.11, 342.12  | G81.10 - G81.14 |
|                           | 342.80 - 342.82 | G81.9X          |
|                           | 342.90 - 342.92 |                 |
| <b>Quadriplegia</b>       |                 |                 |
|                           | 344.00 - 344.04 | G82.5X          |
|                           | 344.09          |                 |
| <b>Paraplegia</b>         |                 |                 |
|                           | 344.1           | G82.20 - G82.22 |

Supplemental Table 2. Population description by insurance type

| Characteristics    | Total<br>(N=317,134) | Medicare<br>Advantage<br>(N=175,669) | Commercially<br>insured<br>(N=141,465) | p value |
|--------------------|----------------------|--------------------------------------|----------------------------------------|---------|
| Age                |                      |                                      |                                        | <0.001  |
| Mean (SD)          | 60.8 (17.7)          | 71.0 (12.2)                          | 48.1 (15.0)                            |         |
|                    |                      |                                      |                                        |         |
| Sex                |                      |                                      |                                        | <0.001  |
| Female             | 186166 (58.7%)       | 101204 (57.6%)                       | 84962 (60.1%)                          |         |
| Male               | 130968 (41.3%)       | 74465 (42.4%)                        | 56503 (39.9%)                          |         |
|                    |                      |                                      |                                        |         |
| Race               |                      |                                      |                                        | <0.001  |
| Asian              | 7249 (2.6%)          | 4002 (2.7%)                          | 3247 (2.6%)                            |         |
| Black              | 35646 (13.0%)        | 21466 (14.4%)                        | 14180 (11.3%)                          |         |
| Hispanic           | 25646 (9.3%)         | 15252 (10.2%)                        | 10394 (8.3%)                           |         |
| White              | 206144 (75.0%)       | 108243 (72.7%)                       | 97901 (77.9%)                          |         |
|                    |                      |                                      |                                        |         |
| Disability Types   |                      |                                      |                                        | <0.001  |
| Spina bifida       | 11339 (3.6%)         | 2777 (1.6%)                          | 8562 (6.1%)                            |         |
| Cerebral palsy     | 19319 (6.1%)         | 9431 (5.4%)                          | 9888 (7.0%)                            |         |
| Multiple sclerosis | 85925 (27.1%)        | 28135 (16.0%)                        | 57790 (40.9%)                          |         |
| Spinal cord Injury | 46340 (14.6%)        | 25249 (14.4%)                        | 21091 (14.9%)                          |         |
| Hemiplegia         | 130096 (41.0%)       | 93883 (53.4%)                        | 36213 (25.6%)                          |         |
| Paraplegia         | 16253 (5.1%)         | 11096 (6.3%)                         | 5157 (3.6%)                            |         |
| Quadriplegia       | 7862 (2.5%)          | 5098 (2.9%)                          | 2764 (2.0%)                            |         |

317,188 unique individuals were identified for this study (Table 1). 317, 134 unique individuals had complete data for insurance and known sex as seen in this table.

Supplemental Table3. AWV use in 2008 and 2016, and Linear trends for ACA time course by insurance, disability, gender, and race

|                   | 2008 AWV % use     | 2016 AWV % use        | Linear Trends         |                           |                       |                   |
|-------------------|--------------------|-----------------------|-----------------------|---------------------------|-----------------------|-------------------|
|                   |                    |                       | Pre-ACA               | Implementing phase of ACA | Post ACA              |                   |
|                   |                    |                       | (2008 to 2010)        | (2011-2013)               | (2014-2016)           |                   |
| <b>Insurance</b>  |                    |                       |                       |                           |                       |                   |
| COM               | 31.3% (30.6, 32.1) | 38.0% (37.0, 38.5)    | 0.27 (0.18, 0.36)     | 1.84 (1.74, 1.96)         | 0.98 (0.81, 1.15)     |                   |
| MA                | 11.4% (10.7, 12.1) | 31.0% (30.7, 31.7)    | 0.74 (0.22, 1.26)     | 2.16 (1.86, 2.47)         | 4.39 (2.61, 6.17)     |                   |
|                   |                    |                       | -0.47 (-1.00, 0.06)   | -0.31 (-0.63, 0.01)       | -3.41 (-5.20, -1.62*) | <i>difference</i> |
| <b>Disability</b> |                    |                       |                       |                           |                       |                   |
| Acquired          | 25.5% (24.9, 26.2) | 33.0% (32.6, 33.4)    | 1.21 (0.01, 2.42)     | 1.72 (1.54, 1.91)         | 2.48 (0.95, 4.02)     |                   |
| Congenital        | 23.1% (21.9, 24.3) | 35.6% (34.7, 36.5)    | -1.20 (-1.38, -1.02)  | 1.18 (0.92, 1.43)         | 2.95 (1.95, 3.95)     |                   |
|                   |                    |                       | 2.41 (1.19, 3.64)*    | 0.55 (0.23, 0.86)*        | -0.47 (-2.30, 1.37)   | <i>difference</i> |
| <b>Gender</b>     |                    |                       |                       |                           |                       |                   |
| Women             | 33.0% (32.2, 33.8) | 36.8% (35.3, 37.2)    | -1.23 (-1.25, -1.21)  | 0.51 (0.18, 0.84)         | 2.39 (1.32, 3.46)     |                   |
| Men               | 11.4% (10.8, 12.1) | 28.5% (28.0, 29.0)    | 0.53 (0.11, 0.94)     | 2.44 (2.38, 2.50)         | 3.64 (2.61, 4.68)     |                   |
|                   |                    |                       | -1.75 (-2.17, -1.34)* | -1.93 (-2.26, -1.60)*     | -1.25 (-2.75, 0.23)   | <i>difference</i> |
| <b>Race</b>       |                    |                       |                       |                           |                       |                   |
| White             | 26.1% (25.4, 26.7) | 34.3% (33.9, 34.7)    | -0.74 (-0.89, -0.59)  | 1.34 (1.15, 1.52)         | 2.90 (1.97, 3.83)     |                   |
| Black             | 19.6% (18.1, 21.2) | 30.12% (29.17, 31.08) | -0.06 (-0.24, 0.12)   | 1.25 (1.19, 1.31)         | 3.84 (2.28, 5.39)     |                   |
|                   |                    |                       | 0.68 (0.44, 0.91)*    | -0.09 (-0.28, 0.11)       | 0.94 (-0.88, 2.75)    | <i>difference</i> |
| Hispanic          | 21.7% (19.8, 23.8) | 30.14% (29.16, 31.1)  | -0.66 (-2.32, 1.00)   | 1.03 (1.03, 1.04)         | 3.27 (1.29, 5.24)     |                   |
|                   |                    |                       | 0.08 (-1.59, 1.74)    | -0.31 (-0.49, -0.12)*     | 0.37 (-1.82, 2.55)    | <i>difference</i> |

MA means Medicare Advantage

COM means Commercial insurance

\* difference represents the statistical difference in linear trends at the p<0.05 level of significance; for race: Black vs. White and Hispanic vs. White.

Supplemental Table 4. Estimates of the linear trends from time series analysis for disability types by insurance

|            |                     | <b>Pre-ACA<br/>(2008 to 2010)</b> | <b>Implementing<br/>phase of ACA<br/>(2011-2013)</b> | <b>Post ACA<br/>(2014-2016)</b> |
|------------|---------------------|-----------------------------------|------------------------------------------------------|---------------------------------|
|            | <i>Linear trend</i> | <b><i>Coeff (95% CI)</i></b>      | <b><i>Coeff (95% CI)</i></b>                         | <b><i>Coeff (95% CI)</i></b>    |
| <b>COM</b> | Congenital          | 2.24 (1.38, 3.10)                 | 2.01 (1.27, 2.76)                                    | 1.22 (1.02, 1.42)               |
|            | Acquired            | -0.28 (-0.44, -0.12)              | 1.81 (1.78, 1.84)                                    | 0.93 (0.67, 1.18)               |
|            |                     |                                   |                                                      |                                 |
|            | Difference          | 2.52 (1.64, 3.40)                 | 0.21 (-0.54, 0.95)                                   | 0.30 (-0.03, 0.62)              |
|            |                     |                                   |                                                      |                                 |
| <b>MA</b>  | Congenital          | 0.69 (0.43, 0.95)                 | 2.41 (1.66, 3.16)                                    | 4.19 (1.52, 6.85)               |
|            | Acquired            | 1.26 (-0.69, 3.21)                | 2.16 (1.70, 2.61)                                    | 4.41 (2.73, 6.10)               |
|            |                     |                                   |                                                      |                                 |
|            | Difference          | 0.57 (-1.40, 2.54)                | 0.25 (-0.63, 1.13)                                   | -0.23 (-3.38, 2.92)             |

Supplemental Table 5: Estimates of the linear trends from time series analysis for gender by insurance

|            |                         | Pre-ACA<br>(2008 to 2010) | Implementation<br>phase of ACA<br>(2011-2013) | Post ACA<br>(2014-2016) |
|------------|-------------------------|---------------------------|-----------------------------------------------|-------------------------|
|            | <i>Linear<br/>trend</i> | <i>Coeff (95% CI)</i>     | <i>Coeff (95% CI)</i>                         | <i>Coeff (95% CI)</i>   |
| <b>COM</b> | Men                     | 0.35 (.006, 0.70)         | 2.76 (2.65, 2.87)                             | 1.72 (1.49,1.95)        |
|            | Women                   | 0.54 (0.47, 0.61)         | 1.38 (1.25, 1.51)                             | 0.63 (0.41,0.86)        |
|            | Difference              | 0.19 (-0.17, 0.54)        | -1.38 (-1.55, -1.21)                          | -1.09 (-1.40,-0.77)     |
| <b>MA</b>  | Men                     | 1.53 (0.80, 2.27)         | 2.48 (2.24, 2.72)                             | 4.56 (2.73,6.39)        |
|            | Women                   | 0.28 (-0.12, 0.68)        | 1.94 (1.59, 2.30)                             | 4.27 (2.53,6.01)        |
|            | Difference              | -1.25 (-2.09,- 0.42)      | -0.54 (-0.97, -0.11)                          | -0.29 (-2.81,2.24)      |

**Supplemental Table 6.** Estimates of the linear trends from time series analysis with 95% CIs for Black vs. White adults by insurance

|            |                     | <b>Pre-ACA<br/>(2008 to 2010)</b> | <b>Implementing phase<br/>of ACA (2011-2013)</b> | <b>Post ACA<br/>(2014-2016)</b> |
|------------|---------------------|-----------------------------------|--------------------------------------------------|---------------------------------|
|            | <i>Linear trend</i> | <i>Coeff (95% CI)</i>             | <i>Coeff (95% CI)</i>                            | <i>Coeff (95% CI)</i>           |
| <b>COM</b> | <b>Black</b>        | 1.44 (0.84, 2.04)                 | 2.15 (1.61, 2.68)                                | 1.32 (1.12, 1.52)               |
|            | White               | 0.09 (-0.25, 0.43)                | 1.95 (1.87, 2.02)                                | 0.91 (0.66, 1.16)               |
|            | Difference          | 1.35 (0.66, 2.03)                 | 0.20 (-0.34, 0.74)                               | 0.41 (0.09, 0.73)               |
| <b>MA</b>  | Black               | 0.38 (-0.09, 0.86)                | 1.97 (1.44, 2.50)                                | 5.59 (3.23, 7.94)               |
|            | White               | 0.81 (0.58, 1.04)                 | 2.25 (2.02, 2.48)                                | 4.53 (2.87, 6.19)               |
|            | Difference          | -0.43 (-0.95, 0.10)               | -0.28 (-0.85, 0.30)                              | 1.06 (-1.82, 3.94)              |

Estimates of the linear trends from time series analysis with 95% CIs for Hispanic vs. White adults by insurance

|            |                     | <b>Pre-ACA<br/>(2008 to 2010)</b> | <b>Implementing phase<br/>of ACA (2011-2013)</b> | <b>Post ACA<br/>(2014-2016)</b> |
|------------|---------------------|-----------------------------------|--------------------------------------------------|---------------------------------|
|            | <i>Linear trend</i> | <i>Coeff (95% CI)</i>             | <i>Coeff (95% CI)</i>                            | <i>Coeff (95% CI)</i>           |
| <b>COM</b> | <b>Hispanic</b>     | 0.99 (-0.61, 2.59)                | 1.76 (1.18, 2.34)                                | <b>2.06 (1.13, 2.99)</b>        |
|            | White               | 0.09 (-0.25, 0.43)                | 1.95 (1.87, 2.02)                                | 0.91 (0.66, 1.16)               |
|            | Difference          | 0.90 (-0.74, 2.53)                | -0.18 (-0.77, 0.40)                              | 1.15 (0.19, 2.11)               |
| <b>MA</b>  | Hispanic            | 0.96 (-1.09, 3.01)                | 1.79 (1.57, 2.00)                                | 4.23 (1.76, 6.70)               |
|            | White               | 0.81 (0.58, 1.04)                 | 2.25 (2.02, 2.48)                                | 4.53 (2.87, 6.19)               |
|            | Difference          | 0.15 (-1.92, 2.21)                | -0.46 (-0.78, -0.15)                             | -0.30 (-3.27, 2.68)             |

Supplemental Figure 1. CONSORT diagram

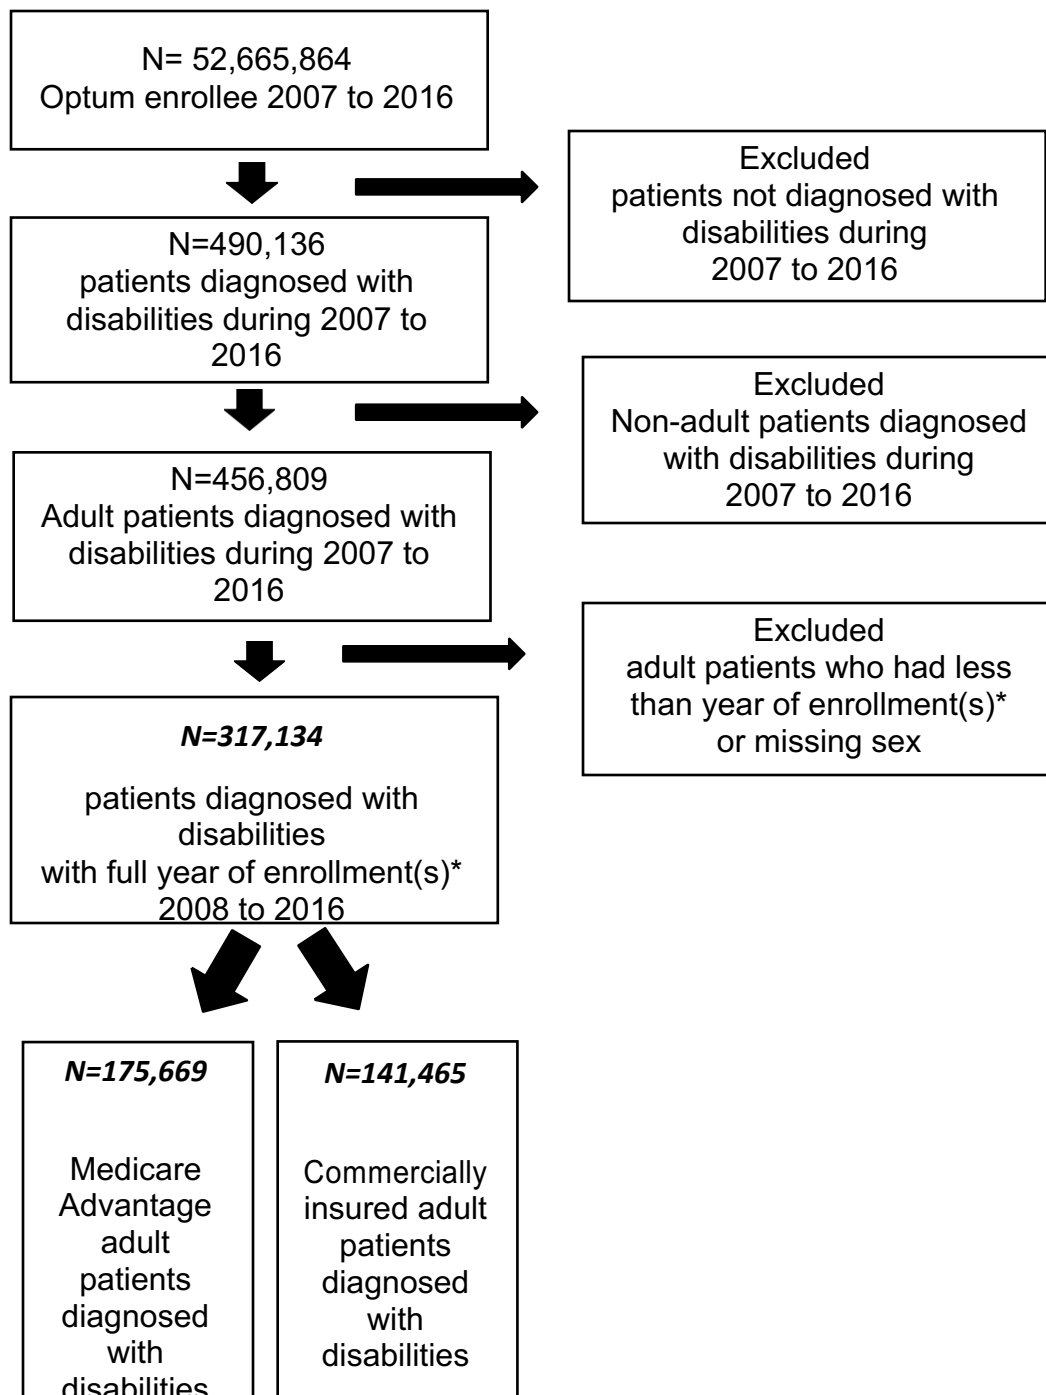

\*For congenital conditions, we included the patient that had full calendar year of enrollment with a diagnosis of the condition at any point during that year. On the other hand, for acquired conditions, we first identified the year in which the patient was first diagnosed during the study period with the condition. We then examined all years that this patient had a full calendar year of enrollment to be included in the study population.

## Supplemental Figure 2. Proportion zero copay and annual wellness visits by insurance and disability

Supplemental Figure 2A. Annual Wellness Visits among the MA insured by disability

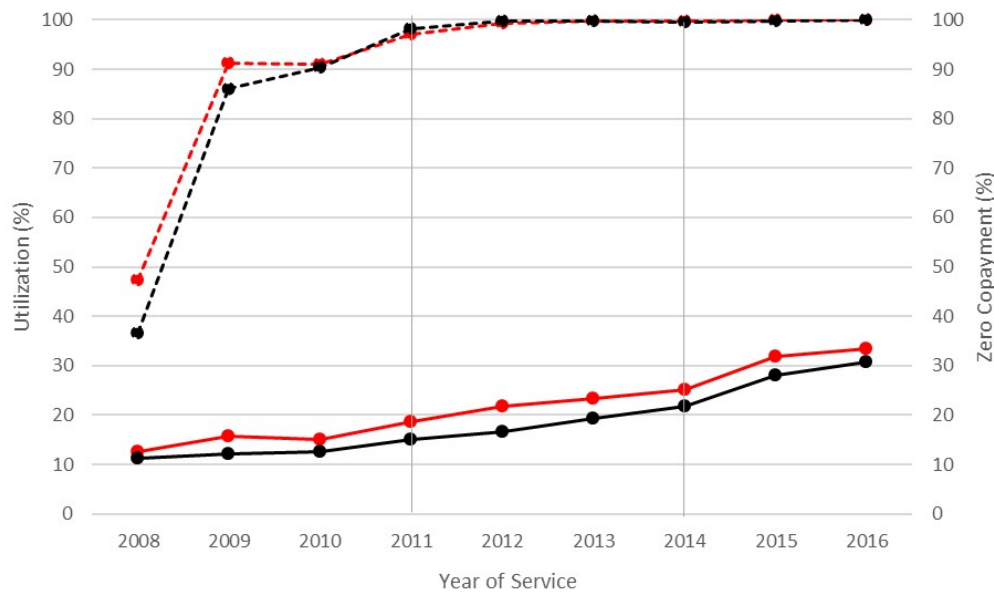

Supplemental Figure 2B. Annual Wellness Visits among the COM insured by disability

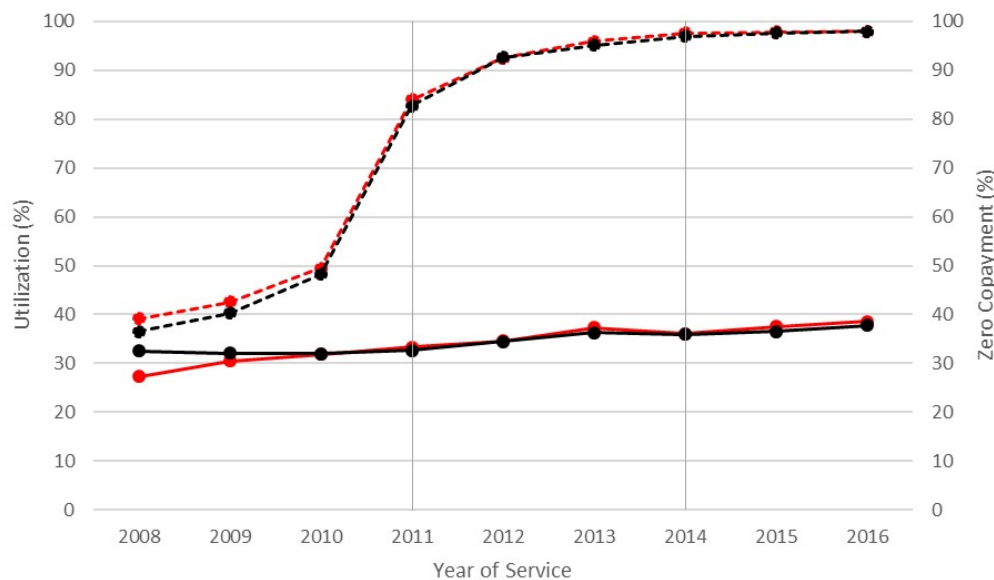

The Pre-ACA period is from 2008-2011. The ACA implementation period is from 2011-2014. The Post-ACA period is from 2014-2016.

The dotted lines represent the proportion of individuals with zero copay.

The solid lines represent utilization rates.

A red line indicates those with a **congenital disability** (SB, CP).

A black line indicates those with an **acquired disability** (SCI, MS, HP, QP, PP).



**Supplemental Figure 3. Proportion zero copay and annual wellness visits by insurance, gender, disability, and race**

**Supplemental Figure 3A. Annual Wellness Visits among the female MA insured by disability and race**

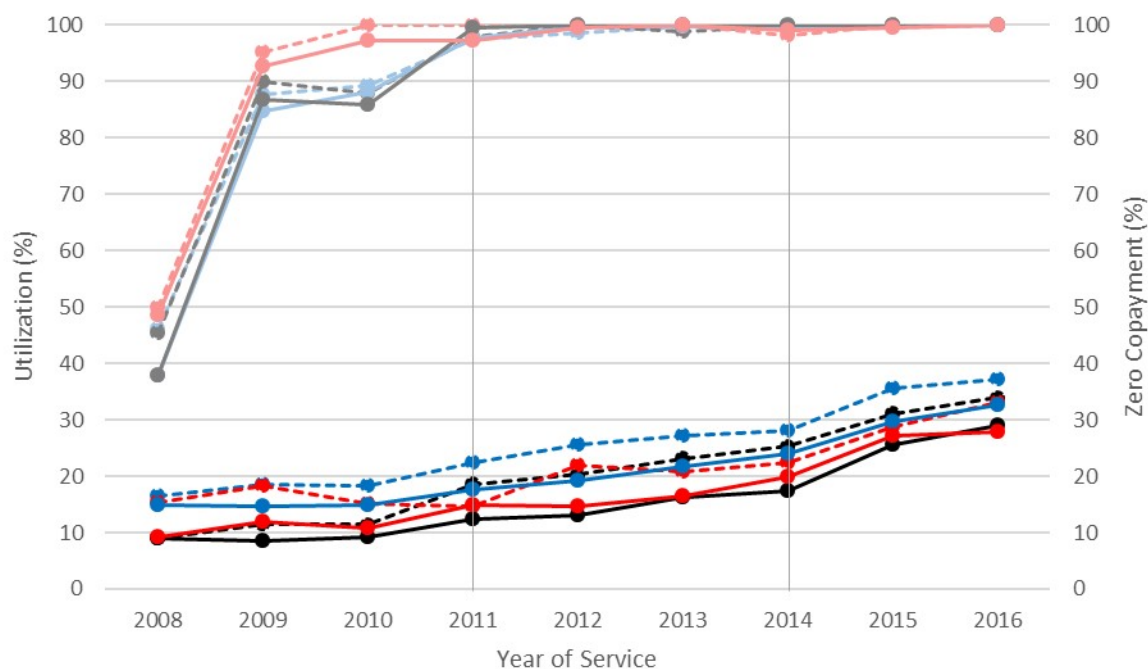

**Supplemental Figure 3B. Annual Wellness Visits among the male MA insured by disability and race**

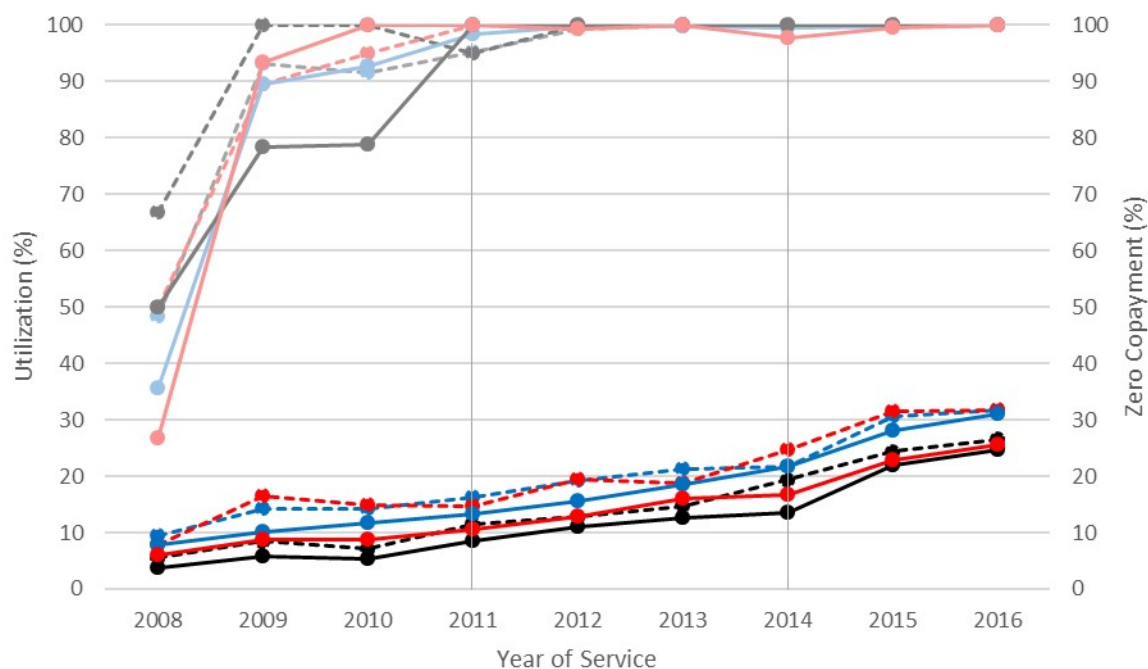

**Supplemental Figure 3C. Annual Wellness Visits among the female COM insured by disability and race**

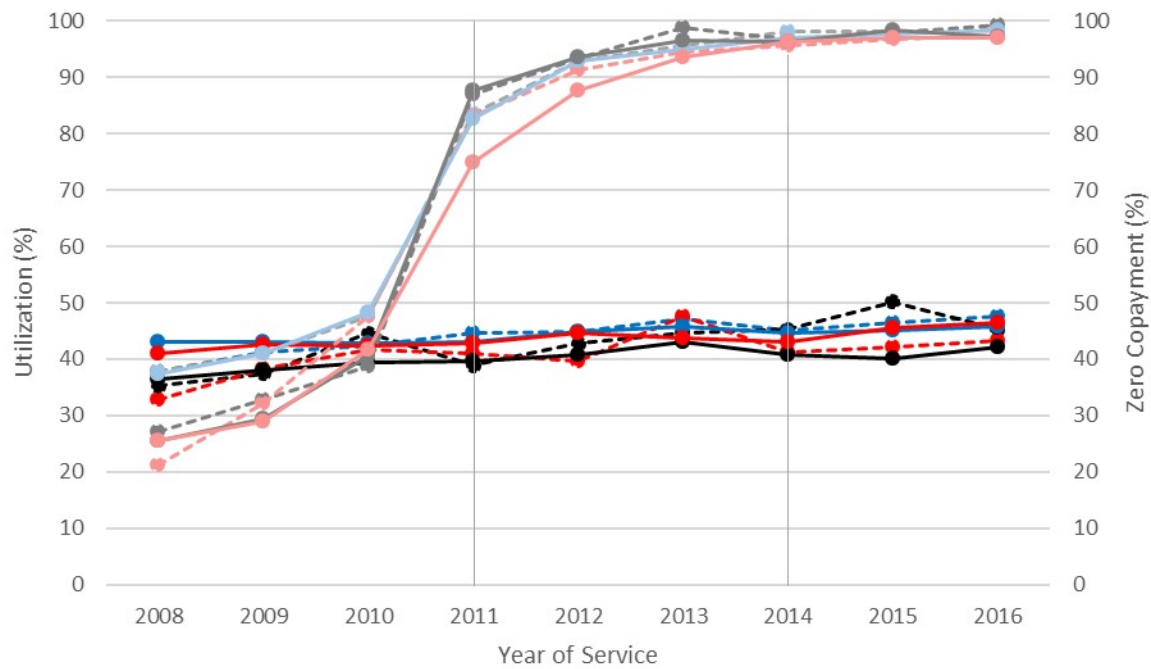

**Supplemental Figure 3D. Annual Wellness Visits among the male COM insured by disability and race**

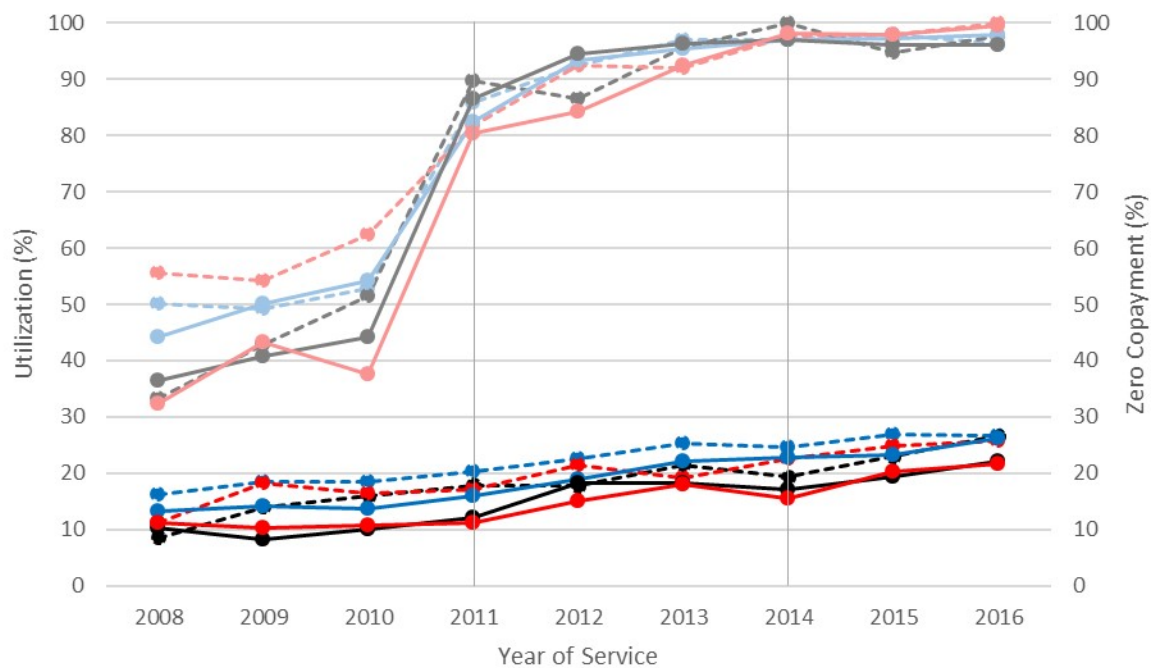

Red line – Hispanic (light red for zero copays, darker red for visit rates)  
 Black line – Black (grey for zero copays, black for visit rates)  
 Blue line – White (light blue for zero copays, darker blue for visit rates)  
 Dotted line – Congenital  
 Solid line – Acquired
